# Supplementary material for: Distinct breast cancer stem/progenitor cell populations require either HIF1α or loss of PHD3 to expand under hypoxic conditions
Source: Oncotarget. 2015 Sep 10;6(31):31721–39. doi: 10.18632/oncotarget.5564 (PMC4741635; doi:10.18632/oncotarget.5564)
Supplement: Supplementary file 1 [file oncotarget-06-31721-s001.pdf]

Distinct breast cancer stem/progenitor cell populations require either HIF1a or loss of PHD3 to expand under hypoxic conditions

Supplementary Material

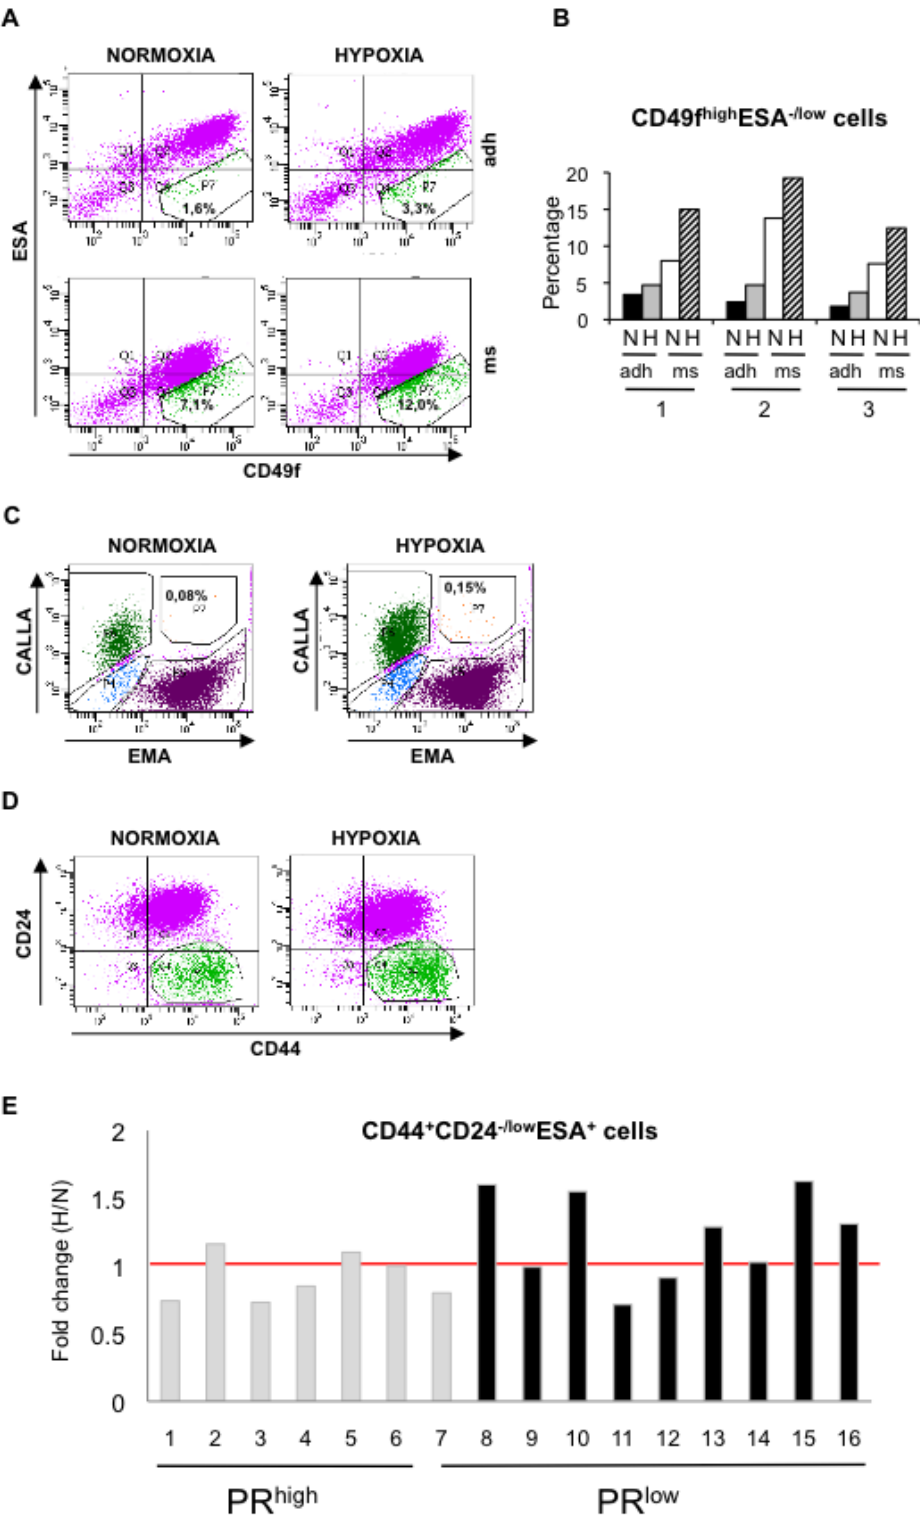

**Supplementary Figure 1. Raw data of FACS analyses using primary normal and breast tumor cells.** (A) Representative plots of CD49f/ESA stainings performed with normal breast epithelial cells cultured in adherent (adh) or mammosphere (ms) and normoxic or hypoxic conditions. (B) Percentage of CD49f<sup>high</sup>ESA<sup>-/low</sup> cells in 3 normal breast epithelial cells cultured in different oxygen conditions, in adherent or suspension conditions. (C, D) Representative plots of EMA/CALLA (c) and CD44/CD24 (d) stainings performed with normal breast epithelial cells cultured in normoxic or hypoxic conditions. (E) CD44<sup>+</sup>CD24<sup>-/low</sup>ESA<sup>+</sup> CSCs in primary tumor samples cultured as mammospheres, presented as fold change between hypoxia and normoxia.

**A**

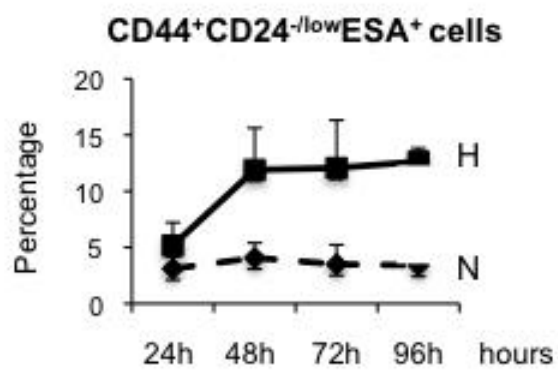

**B**

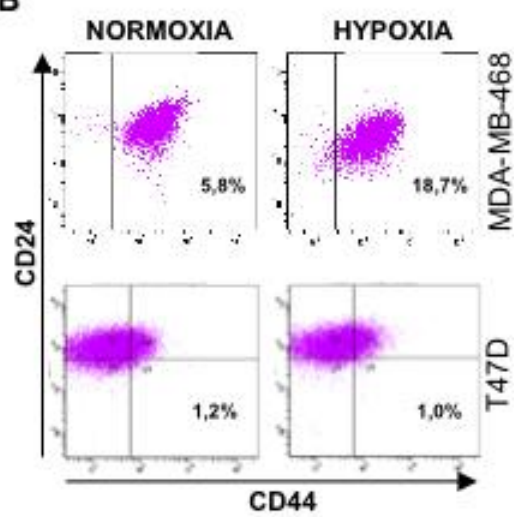

**C**

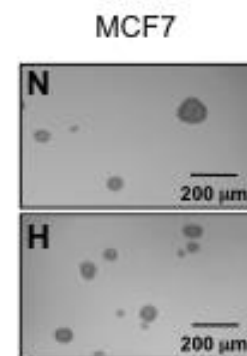

**D**

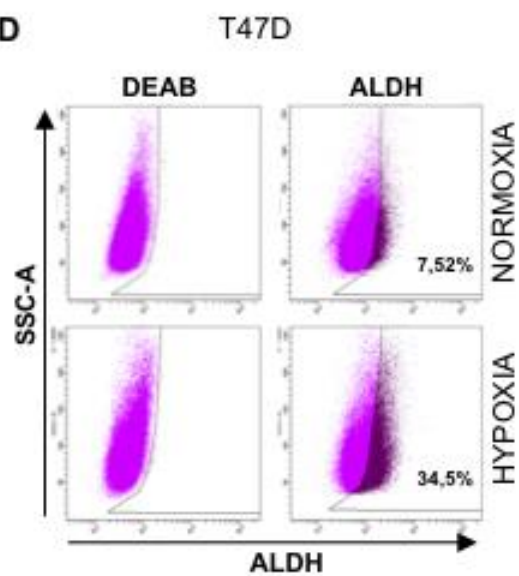

**Supplementary Figure 2. Raw data of FACS analyses using breast cancer cells.** (A) Time course of the changes in  $CD44^{+}CD24^{-/low}ESA^{+}$  subpopulation of MDA-MB-468 cells cultured in normoxic or hypoxic conditions. B) Representative examples of FACS plots obtained after CD44/CD24 staining in MDA-MB-468 cells and T47D cells grown under different oxygen concentrations. ESA staining is omitted because all cells were  $ESA^{+}$  regardless of culture conditions. (C) Representative example of 5-day mammosphere cultures of MCF-7 cells in normoxic (N) or hypoxic (H) conditions. (D) Representative FACS plots of ALDEFLUOR staining performed in T47D cells cultured in normoxia or hypoxia for 3 days.

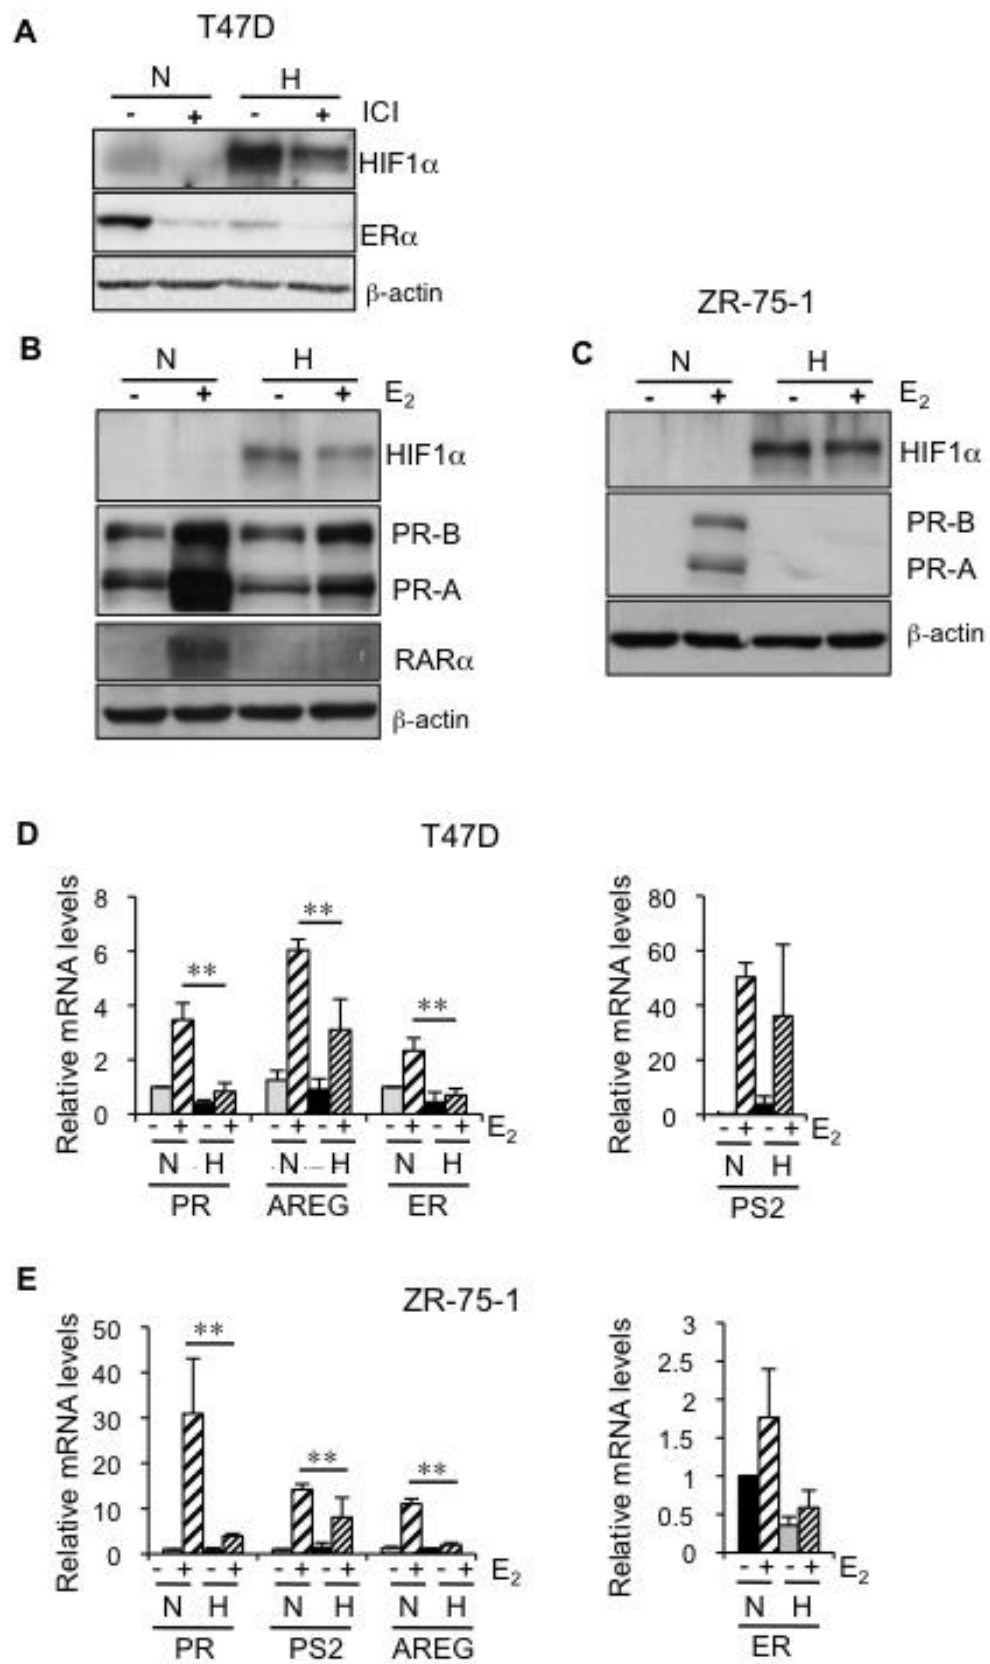

**Supplementary Figure 3. Hypoxia reduces ER expression and transcriptional activity in T47D and ZR75-1 cells.** (A) Representative western blots showing expression of HIF1 $\alpha$  and ER in T47D cells treated with fulvestrant (ICI 182,870). (B) Representative western blot showing expression of HIF1 $\alpha$ , PR and RAR $\alpha$  in T47D cells treated or not with 10 nM estrogen, in normoxia or hypoxia. (C) Representative western blot showing expression of HIF1 $\alpha$  and PR in ZR75-1 cells treated or not with estrogen, in normoxia or hypoxia. (D, E) mRNA expression levels of ER and its target genes PR, PS2 and AREG in T47D (D) or ZR75-1 (E) cells after culturing them under normoxic or hypoxic conditions, with or without estrogen. Means  $\pm$ SD of 3 independent experiments are shown. In all cases, cells were starved in estrogen-free conditions for 2 days before treating them with 10 nM estrogen and/or hypoxia for 42 h. \*\* $P$ <0.01.

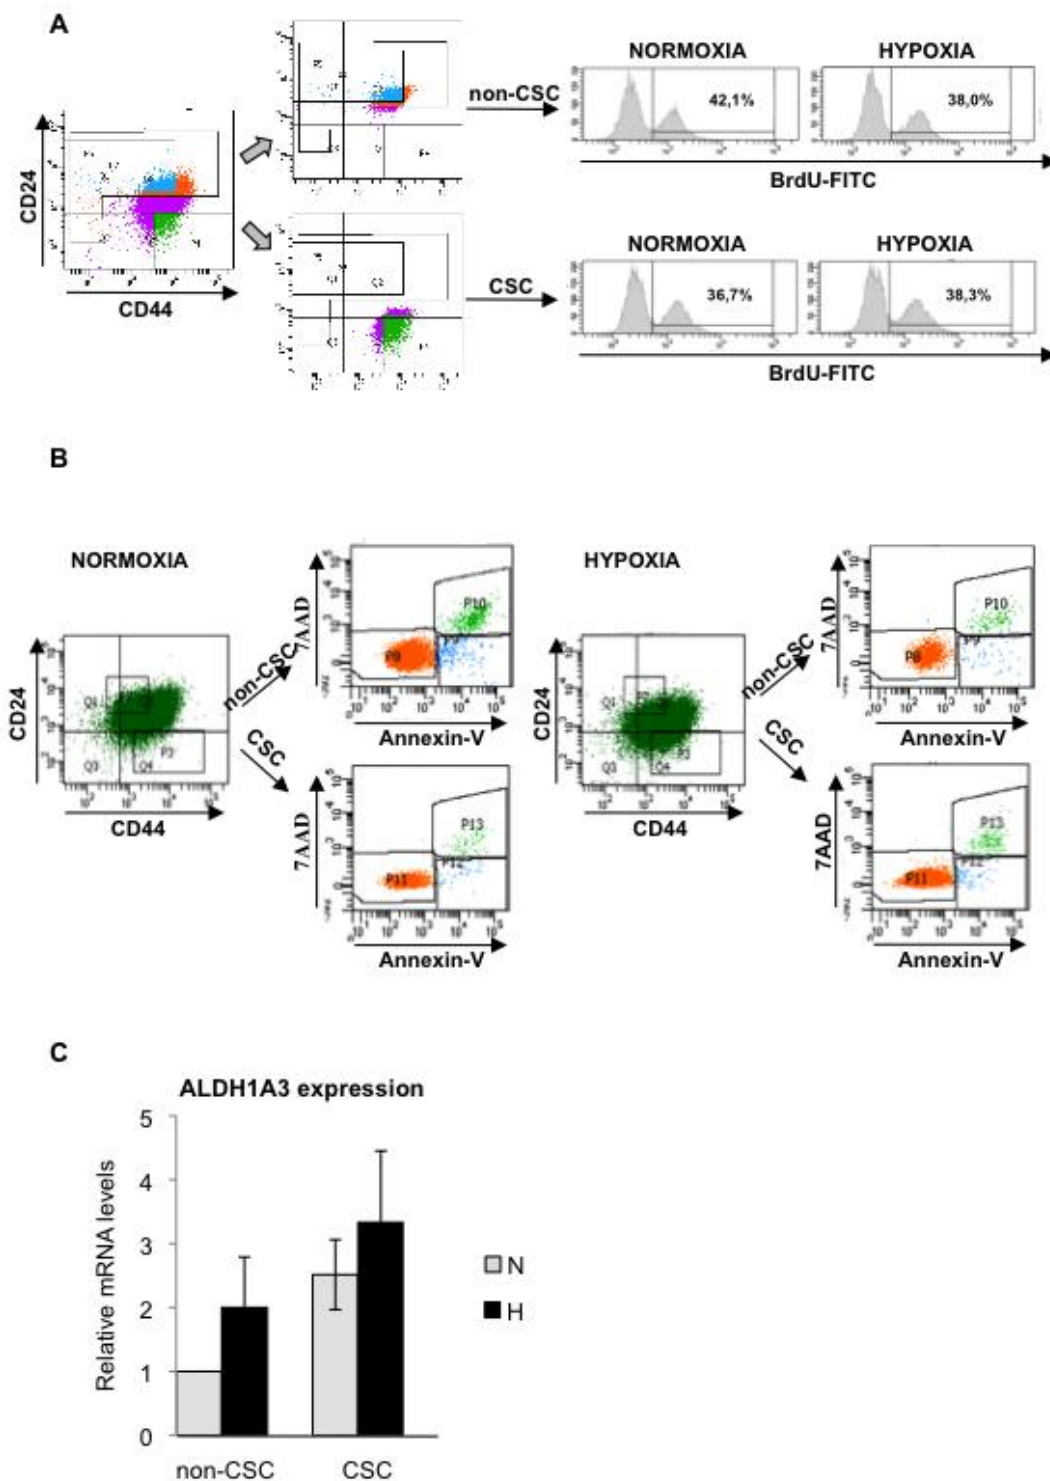

**Supplementary Figure 4. Representative plots of proliferation and apoptosis in sorted populations and analysis of ALDH1A3 mRNA expression.** (A) Plots representing BrdU

incorporation of sorted CSCs and non-CSCs cultured in normoxic or hypoxic conditions. MDA-MB-468 cells were stained with anti-CD44 and anti-CD24 antibodies, and  $CD44^{+}CD24^{-/low}$  CSCs and  $CD44^{+}CD24^{high}$  non-CSCs were sorted and cultured in normoxia or hypoxia for 24 h. Cells were then treated with 10  $\mu$ M BrdU for 1h and harvested. (B) Representative plots of AnnexinV/7AAD stainings. MDA-MB-468 cells cultured in normoxia or hypoxia for 3 days were stained and sorted.  $CD44^{+}CD24^{-/low}$  CSCs and  $CD44^{+}CD24^{high}$  non-CSCs were then used for annexinV/7AAD staining, in order to detect early and late apoptotic cells. (C) Analysis of ALDH1A3 mRNA expression in T47D cells obtained after culturing sorted  $ALDH^{+}$  CSCs and  $ALDH^{-}$  non-CSCs in normoxia or hypoxia for 3 days, as seen in Figure 4E and 4F. The figure shows means  $\pm$ SD of three independent experiments.

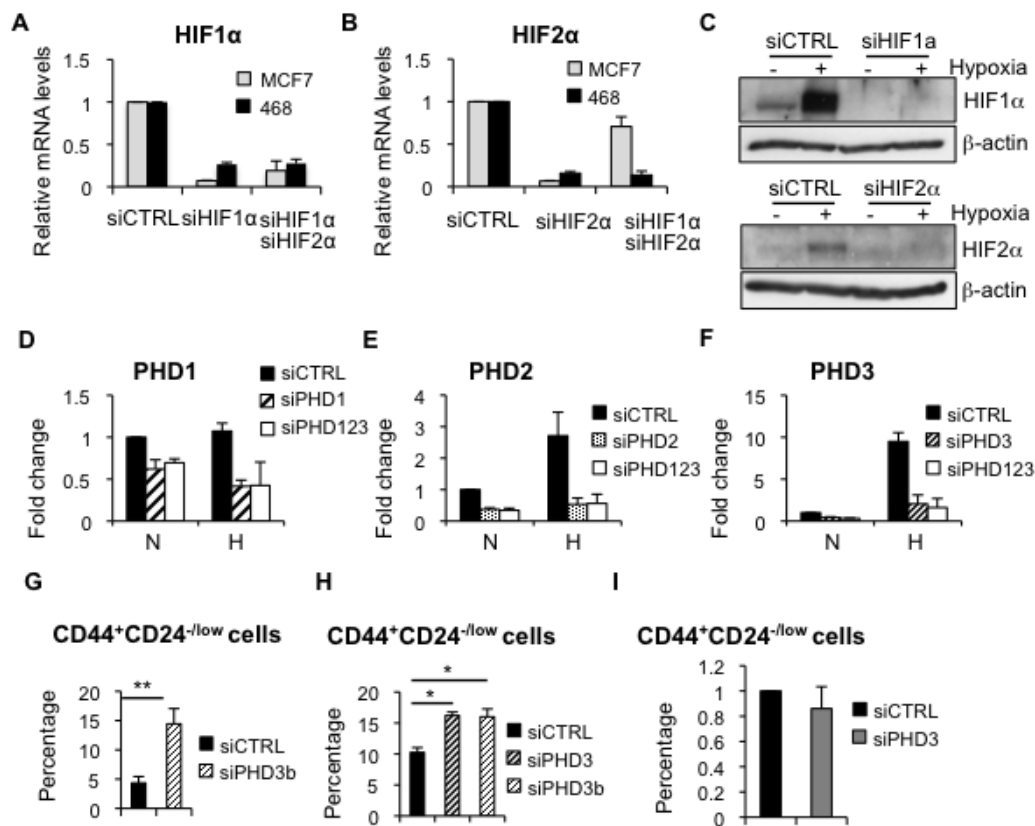

**Supplementary Figure 5. Molecular analysis of HIF and PHDs.** (A, B) qPCR analysis of silencing efficiencies for HIF1 $\alpha$  (A) and HIF2 $\alpha$  (B) in MCF-7 or MDA-MD-468 cells, as indicated. (C) Western blot analysis of silencing efficiencies for HIF1 $\alpha$  and HIF2 $\alpha$  in T47D cells where ALDH activity was evaluated after downregulation of these genes. (D-F) mRNA expression levels of PHD1, PHD2, and PHD3 in experiments where the percentage of C44<sup>+</sup>CD24<sup>-/low</sup> CSCs was evaluated after downregulation of these genes. (G) Percentage of CD44<sup>+</sup>CD24<sup>-/low</sup> CSCs in MDA-MB-468 cells after downregulation of PHD3 with an alternative siRNA sequence. (H) Percentage of CD44<sup>+</sup>CD24<sup>-/low</sup> in BT549 cells after downregulation of PHD3 with 2 different siRNA sequences. (I) Percentage of CD44<sup>+</sup>CD24<sup>-/low</sup> in MCF-7 cells after downregulation of PHD3 with a specific siRNA sequence.

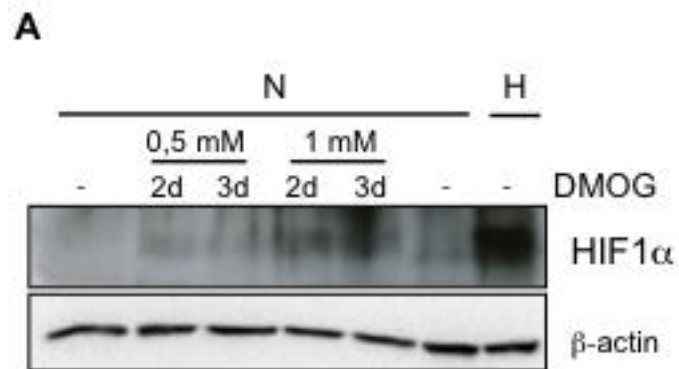

**Supplementary Figure 6. Analysis of HIF1α protein expression levels.**

(A) Western blot of HIF1α stabilization in MDA-MB-468 cells treated with DMOG or hypoxia.

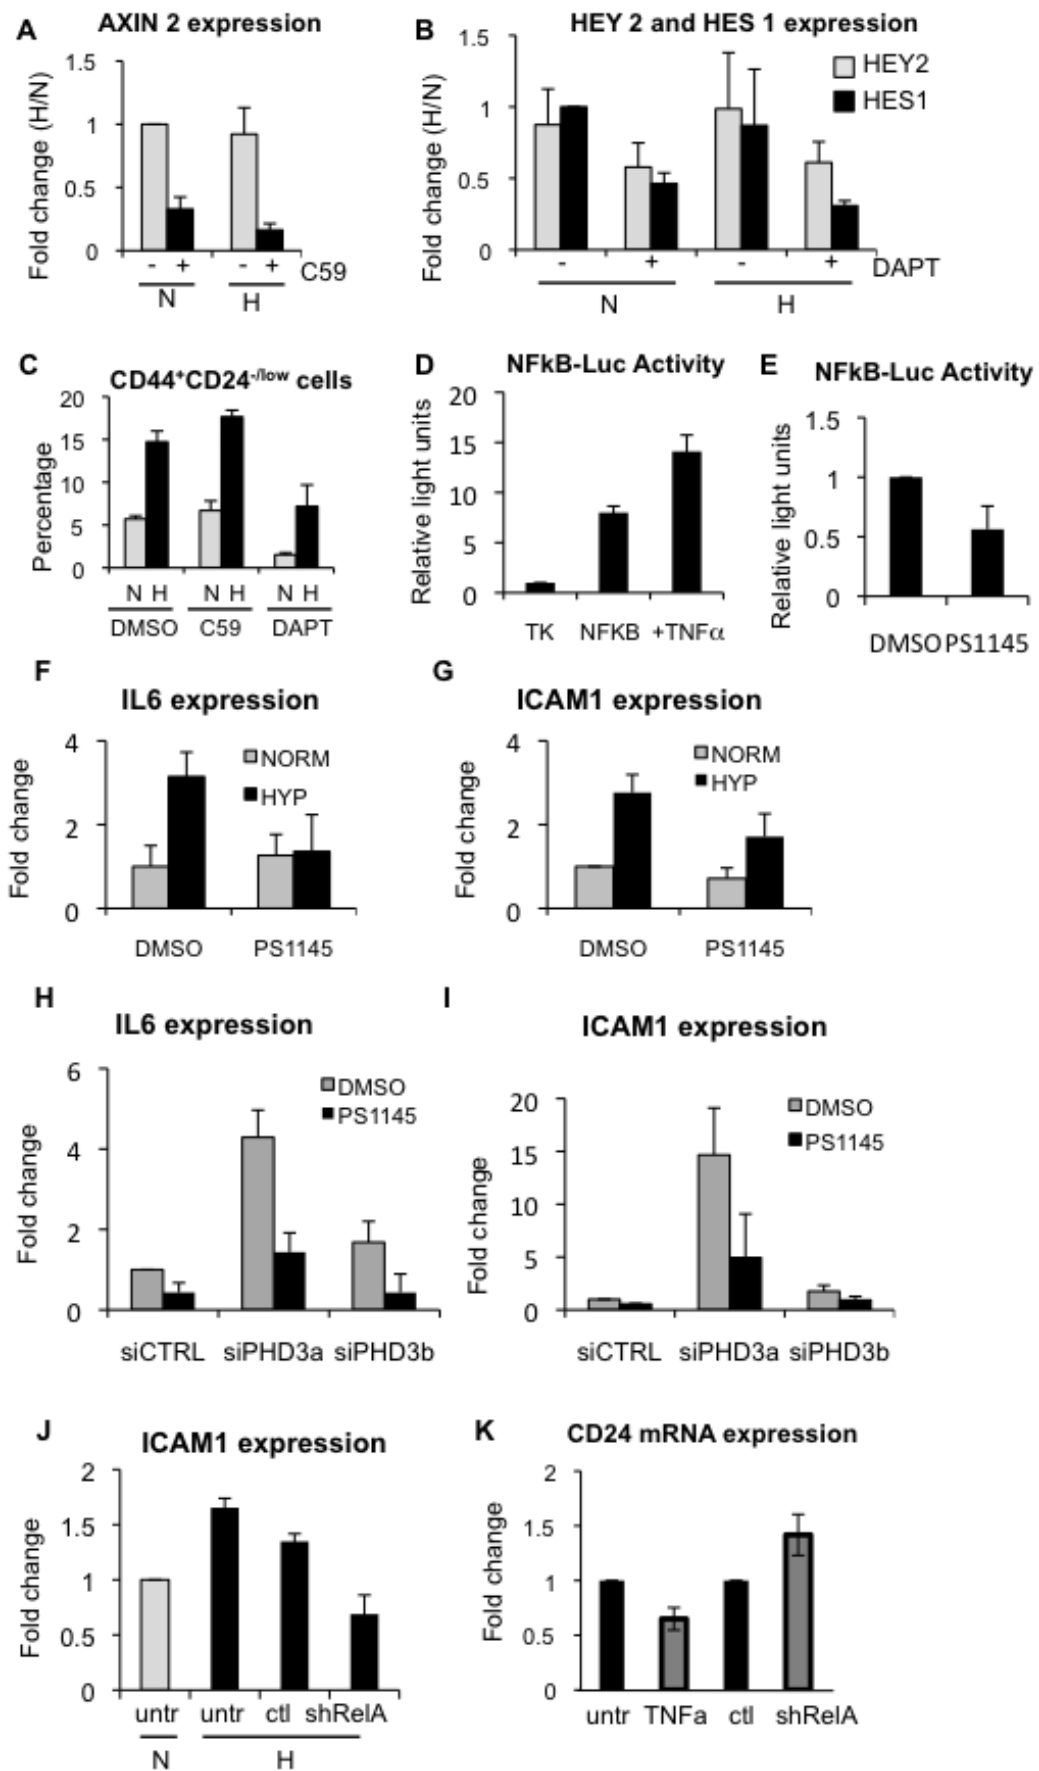

**Supplementary Figure 7. Analysis of the implication of NFkB signaling in CSCs.**

(A) Axin2 mRNA expression levels in MDA-MB-468 cells treated or not with C59 and cultured in normoxia or hypoxia for 3 days. (B) HEY2 (grey bars) and HES1 (black bars) mRNA expression levels in MDA-MB-468 cells treated or not with DAPT and cultured in normoxia or hypoxia for 3 days. (C) Percentage of CD44<sup>+</sup>CD24<sup>-/low</sup> in MDA-MB-468 cells cultured in normoxia or hypoxia for 3 days, in the presence, or absence of C59 100 nM (Wnt inhibitor), or DAPT 10  $\mu$ M (Notch inhibitor). (D) NFkB transcriptional activity in MDA-MB-468 cells stimulated with TNF $\alpha$  10 ng/ml for 3 h. (E) NFkB transcriptional activity in MDA-MB-468 cells cultured in the presence or absence of 2  $\mu$ M PS1145. (F, G) IL-6 and ICAM1 mRNA expression levels in MDA-MB-468 cells cultured in normoxia or hypoxia for 3 days, in the presence or absence of 2  $\mu$ M PS1145. (H, I) IL-6 and ICAM1 mRNA expression levels in MDA-MB-468 cells silenced with siCTRL or siPHD3 for 3 days, in the presence or absence of 2  $\mu$ M PS1145. Data are presented as fold change with respect to control siRNA in DMSO as 1. (J) ICAM1 mRNA expression levels in BT549 cells untransfected in normoxia (grey bar) or hypoxia (black bars) or transfected with shRelA (as Figure 7H). (K) CD24 mRNA expression levels in BT549 cells untreated (untr) or treated with 10 ng/ml TNF $\alpha$  (TNFa) and transfected with a sh control (ctl) or shRelA/p65 (shRelA).

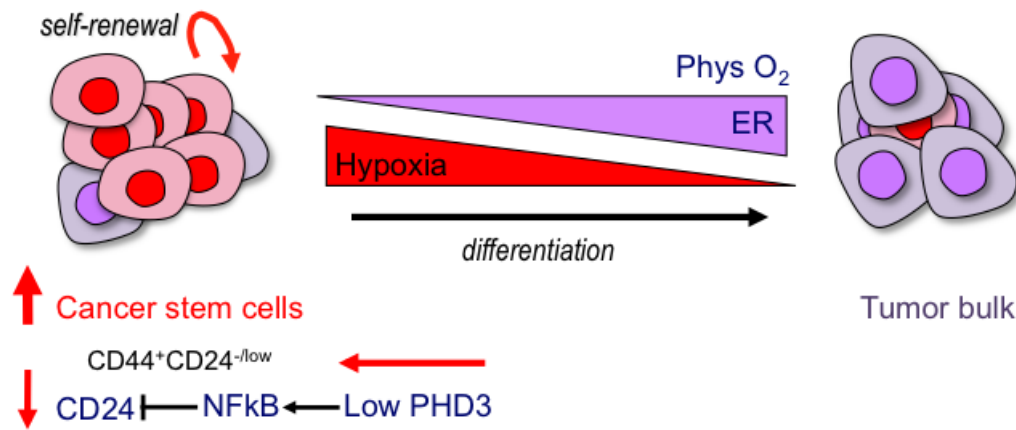

**Supplementary Figure 8. Model summarizing the signaling pathways that link hypoxia to dedifferentiation of breast cancer cells.**

The increase in CSC following hypoxic stress is at least partly regulated by the NFkB signaling pathway. Hypoxic conditions or down-regulation of PHD3 in ER-negative breast tumor cells leads to activation of NFkB signaling and a reduction in expression of CD24, resulting in the expansion of the CD44<sup>+</sup>CD24<sup>-low</sup> cancer stem cell population.

## Supplementary Tables

**Supplementary Table 1.** Clinical data of patients participating in the study. Samples were obtained from women undergoing reduction mammoplasties with no previous history of breast cancer. NA, not applicable, ND, no data available.

|          | Age | Day of menstrual cycle | Number of children | Number of children breast-fed | Contraceptive pill intake |
|----------|-----|------------------------|--------------------|-------------------------------|---------------------------|
| <b>1</b> | 24  | 21                     | 0                  | NA                            | NO                        |
| <b>2</b> | 42  | 22                     | 1                  | 1                             | NO                        |
| <b>3</b> | 27  | 17                     | 0                  | NA                            | NO                        |
| <b>4</b> | 43  | 28                     | 2                  | 2                             | ND                        |

**Supplementary Table 2.** Histopathological data of primary tumor samples analyzed for CD44<sup>+</sup>CD24<sup>-/low</sup>ESA<sup>+</sup> content.

|    | Age | Histol.<br>type | Grade, size and<br>nodal status | ER/PR/HER2                                   | Ki67         | p53         |
|----|-----|-----------------|---------------------------------|----------------------------------------------|--------------|-------------|
| 1  | 71  | IDC             | G2 T2 (2,2) cm N+               | ER +++ (98%)<br>PR ++/+++ (82%)<br>HER2 (3+) | +++<br>(16%) | +<br>(15%)  |
| 2  | 55  | IDC             | G3 T2 N-                        | ER +++ (80%)<br>PR +++ (80%)<br>HER2 (-1+)   | +++<br>(20%) | ++<br>(20%) |
| 3  | 46  | IDC             | G1, T1c                         | ER +++ (98%)<br>PR +++ (80%)<br>HER2 (3+)    | 7%           | (<10%)      |
| 4  | 59  | IDC             | G2, T2                          | ER +++ (80%)<br>PR +++ (90%)<br>HER2 -       | 5%           | 20%         |
| 5  | 68  | ILC             | G2, T2, N-                      | ER +++ (80%)<br>PR +++ (80%)<br>HER2 (-)     | +++<br>(8%)  | -           |
| 6  | 69  | Medullar        | G3, pT2                         | ER+++ (98%)<br>PR+++ (80%)<br>HER2(-)        | 1-2%         | -           |
| 7  | 50  | IDC             | G2, pT2, pN2, pL1.              | ER ++ (40%)<br>PR +++ (70%)<br>HER2 (-)      | +++<br>(43%) | unknown     |
| 8  | 51  | IDC             | G2 T2 2,2cm                     | ER +++ (96%)<br>PR + (11%)<br>HER2 (2+)      | +++<br>(16%) | -           |
| 9  | 79  | IDC             | G3, T2                          | ER -<br>PR -<br>HER2 (2+)                    | +++<br>(60%) | ++<br>(80%) |
| 10 | 53  | IDC             | G1                              | ER ++ (50%)<br>PR -<br>HER2 (3+)             | ++<br>(15%)  | -           |
| 11 | 80  | IDC             | G3 T2 (4cm) N-                  | ER -<br>PR -<br>HER2 -                       | +++<br>(80%) | -           |
| 12 | 80  | IDC             | G3, T1                          | ER -<br>PR -<br>HER2 (3+)                    | +++<br>(10%) | -           |
| 13 | 72  | C               | G3, pT2                         | ER (-)<br>PR (-)<br>HER2 (-)                 | +++<br>(80%) | -           |
| 14 | 59  | IDC             | G2, pT2, pN1a                   | ER+++ (80%)<br>PR + (11%)<br>HER2 3+         | 15%          | 10%         |
| 15 | 36  | IDC             | G3, pT2, pN0                    | ER -<br>PR -<br>HER2 (-)                     | +++<br>(85%) | 5%          |
| 16 | 61  | ILC             | G2, pT2, pN1c                   | ER ++ +(100%)<br>PR + (11%)<br>HER2 (+)      | +<br>(15%)   | 5%          |

**Supplementary Table 3.** Primer sequences used for qPCR amplification of the genes indicated.

| Gene          | Forward Primer 5' – 3'    | Reverse Primer 5' – 3'   |
|---------------|---------------------------|--------------------------|
| 36B4          | GTGTTGACAATGGCAGCAT       | GACACCCTCCAGGAAGCGA      |
| ER $\alpha$   | CCACCAACCAGTGCACCATT      | GGTCTTTTCGTATCCCACCTTTC  |
| PR            | CGCGCTCTACCCTGCACTC       | TGAATCCGGCCTCAGGTAGTT    |
| AXIN2         | CTGGCTCCAGAAGATCACAAAG    | ATCTCCTCAAACACCGCTCCA    |
| CD24          | TGAAGAACATGTGAGAGGTTTGAC  | GAAAACTGAATCTCCATTCCACAA |
| PS2           | TCGGGGTCGCCTTTGGAGCAG     | GAGGGCGTGACACCAGGAAAACCA |
| ICAM1         | ACGCTGAGCTCCTCTGCTACTC    | GGGCAGGATGACTTTTGAGG     |
| HIF2 $\alpha$ | GTCACCAGAACTTGTGC         | CAAAGATGCTGTTTCATGG      |
| HIF1 $\alpha$ | CTGCAACATGGAAGGTATTGCA    | TACCCACACTGAGGTTGGTTACTG |
| PHD1          | TGACCGGTTGCTCATTTTCTG     | TGGCATAGGCTGGCTTCAC      |
| PHD2          | AGCTGGTCAGCCAGAAGAGT      | GCCCTCGATCCAGGTGATCT     |
| PHD3          | GGCTGGGCAAATACTACGTCAA    | CCTGTTCCATTTCCCGGATAG    |
| PS2           | TCGGGGTCGCCTTTGGAGCAG     | GAGGGCGTGACACCAGGAAAACCA |
| HES1          | TAGCTCGCGGCATTCCAAGC      | GTGCTCAGCGCAGCCGTCATCT   |
| HEY2          | TTGTTTGTTCCACTGCTGGT      | CCCGCCCTTGTCAGTATC       |
| AREG          | TGGAAGCAGTAACATGCAAAATGTC | GGCTGCTAATGCAATTTTGTATAA |
| IL6           | CCTCGACGGCATCTCAGCCCT     | TCTGCCAGTGCCTCTTTGCTGC   |

**Supplementary Table 4.** The RNAi sequences used in this study are shown.

| Gene            | siRNA sequence          |
|-----------------|-------------------------|
| siHIF1 $\alpha$ | AGGACAAGUCACCACAGGATT   |
| siHIF2 $\alpha$ | GCAAAUGUACCCAAUGAUATT   |
| siPHD1          | GACAGAAAGGUGUCCAAGUTT   |
| siPHD2          | CUUCAGAUUCGGUCGGUATT    |
| siPHD3a         | CAGGUUAUGUUCGCCACGUGGTT |
| siPHD3b         | GCAAUGGUGGCUUGCUAUCTT   |
| siCTRL          | CCUACAUCCCGAUCGAUGAUGTT |
